# Supplementary material for: A Novel Class of Tyrosyl-DNA Phosphodiesterase 1 Inhibitors That Contains the Octahydro-2H-chromen-4-ol Scaffold
Source: MDPI journal article supplement (doi:10.3390/molecules23102468), 2018-09-26
Supplement: s1 [file s1]

## Supplementary information

### A Novel Class of (-)-Isopulegol Based Tyrosyl-DNA Phosphodiesterase 1 Inhibitors

Nikolai S. Li-Zhulanov<sup>1,2</sup>, Alexandra L. Zakharenko<sup>3</sup>, Arina A. Chepanova<sup>3</sup>, Jinal Patel<sup>4</sup>, Ayesha Zafar<sup>4</sup>, Konstantin P. Volcho<sup>1,2,\*</sup>, Nariman F. Salakhutdinov<sup>1,2</sup>, Jóhannes Reynisson<sup>4,\*</sup>, Ivanhoe K.H. Leung<sup>4,\*</sup>, and Olga I. Lavrik<sup>2,3</sup>

1. N. N. Vorozhtsov Novosibirsk Institute of Organic Chemistry, Siberian Branch of the Russian Academy of Sciences, 9, Akademika Lavrentieva Ave., Novosibirsk, 630090, Russian Federation
2. Novosibirsk State University, Pirogova 2, Novosibirsk, 630090, Russian Federation
3. Novosibirsk Institute of Chemical Biology and Fundamental Medicine, Siberian Branch of the Russian Academy of Sciences, 8, Akademika Lavrentieva Ave., Novosibirsk, 630090, Russian Federation
4. School of Chemical Sciences, The University of Auckland, Private Bag 92019, Victoria Street West, Auckland 1142, New Zealand

**Table S1. Calculated molecular descriptors for the selected compounds.**

| <b>Compound</b> | <b>MW(g/mol)</b> | <b>HB Donor</b> | <b>HB Acceptor</b> | <b>Log P</b> | <b>PSA(Å<sup>2</sup>)</b> | <b>Rotatable Bonds</b> |
|-----------------|------------------|-----------------|--------------------|--------------|---------------------------|------------------------|
| <b>(4R)-8</b>   | 311.4            | 1               | 3.4                | 3.1          | 72.9                      | 2                      |
| <b>(4S)-8</b>   | 311.4            | 1               | 3.4                | 3.1          | 71.8                      | 2                      |
| <b>(4R)-9</b>   | 281.4            | 2.5             | 3.4                | 2.8          | 53.2                      | 1                      |
| <b>(4S)-9</b>   | 281.4            | 2.5             | 3.4                | 2.8          | 51.4                      | 1                      |
| <b>(4R)-10</b>  | 385.5            | 2               | 4.9                | 4.2          | 65.2                      | 3                      |
| <b>(4S)-10</b>  | 385.5            | 2               | 4.9                | 4.3          | 63.1                      | 3                      |
| <b>(4R)-11</b>  | 323.5            | 2               | 4.9                | 3.0          | 68.9                      | 2                      |
| <b>(4S)-11</b>  | 323.5            | 2               | 4.9                | 3.3          | 64.6                      | 2                      |
| <b>(4R)-12</b>  | 377.4            | 2               | 4.9                | 3.9          | 64.9                      | 2                      |
| <b>(4S)-12</b>  | 377.4            | 2               | 4.9                | 4.1          | 62.9                      | 2                      |
| <b>(4R)-13</b>  | 443.6            | 2               | 4.9                | 5.1          | 62.8                      | 3                      |
| <b>(4S)-13</b>  | 443.6            | 2               | 4.9                | 5.1          | 60.8                      | 3                      |
| <b>(4R)-14</b>  | 435.6            | 2               | 4.9                | 5.5          | 61.2                      | 3                      |
| <b>(4S)-14</b>  | 435.6            | 2               | 4.9                | 5.3          | 62.3                      | 3                      |
| <b>(4R)-15</b>  | 435.6            | 2               | 4.9                | 5.2          | 64.1                      | 3                      |
| <b>(4S)-15</b>  | 435.6            | 2               | 4.9                | 5.3          | 64.4                      | 3                      |
| <b>(4R)-16</b>  | 351.5            | 2               | 4.9                | 3.9          | 61.9                      | 3                      |
| <b>(4S)-16</b>  | 351.5            | 2               | 4.9                | 3.8          | 63.4                      | 3                      |
| <b>(4R)-17</b>  | 365.5            | 2               | 4.9                | 4.2          | 59.4                      | 3                      |
| <b>(4S)-17</b>  | 365.5            | 2               | 4.9                | 4.1          | 60.9                      | 3                      |

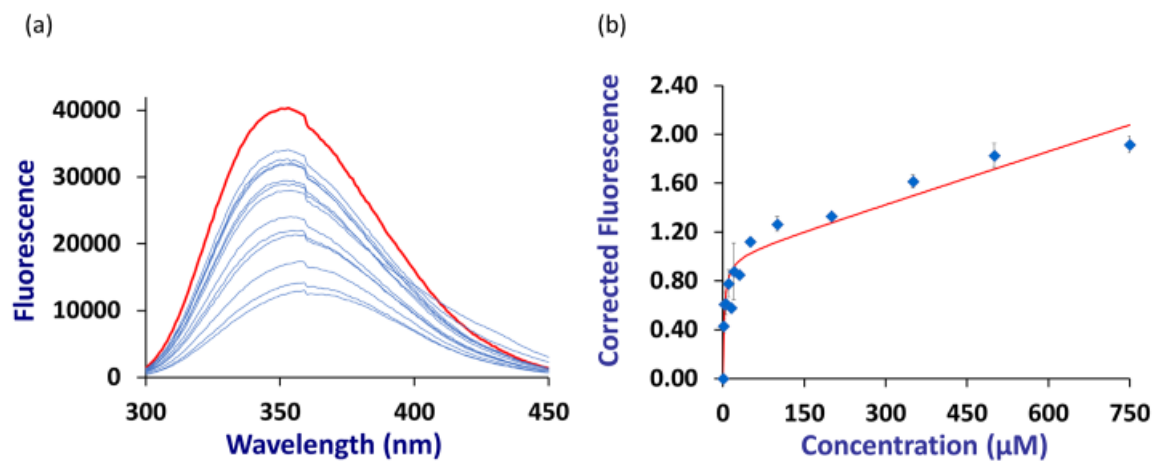

**Supplementary Figure S1:** (a) Changes in intrinsic fluorescence intensity of Tdp1 (10  $\mu\text{M}$ ) upon the addition of compound **8** (4*S*) (1  $\mu\text{M}$ , 2.5  $\mu\text{M}$ , 5  $\mu\text{M}$ , 10  $\mu\text{M}$ , 15  $\mu\text{M}$ , 20  $\mu\text{M}$ , 30  $\mu\text{M}$ , 50  $\mu\text{M}$ , 100  $\mu\text{M}$ , 200  $\mu\text{M}$ , 350  $\mu\text{M}$ , 500  $\mu\text{M}$  and 750  $\mu\text{M}$ ). Buffer was 20 mM Tris and 250 mM NaCl (pH 8). Excitation wavelength was 280 nm and intrinsic fluorescence was measured between 300 and 450 nm; (b) Non-linear curve fitting of the fluorescence data. The  $K_D$  was  $30.6 \pm 9.33$   $\mu\text{M}$ . Experiments were conducted in triplicate.

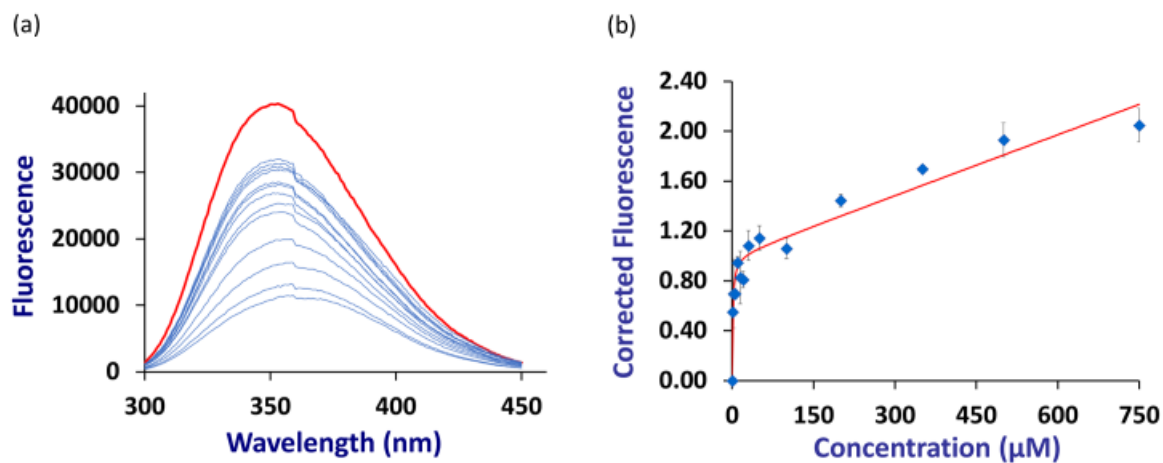

**Supplementary Figure S2:** (a) Changes in intrinsic fluorescence intensity of Tdp1 (10  $\mu\text{M}$ ) upon the addition of compound 8 (4R) (1  $\mu\text{M}$ , 2.5  $\mu\text{M}$ , 5  $\mu\text{M}$ , 10  $\mu\text{M}$ , 15  $\mu\text{M}$ , 20  $\mu\text{M}$ , 30  $\mu\text{M}$ , 50  $\mu\text{M}$ , 100  $\mu\text{M}$ , 200  $\mu\text{M}$ , 350  $\mu\text{M}$ , 500  $\mu\text{M}$  and 750  $\mu\text{M}$ ). Buffer was 20 mM Tris and 250 mM NaCl (pH 8). Excitation wavelength was 280 nm and intrinsic fluorescence was measured between 300 and 450 nm; (b) Non-linear curve fitting of the fluorescence data. The  $K_D$  was  $23.3 \pm 7.4 \mu\text{M}$ . Experiments were conducted in triplicate.

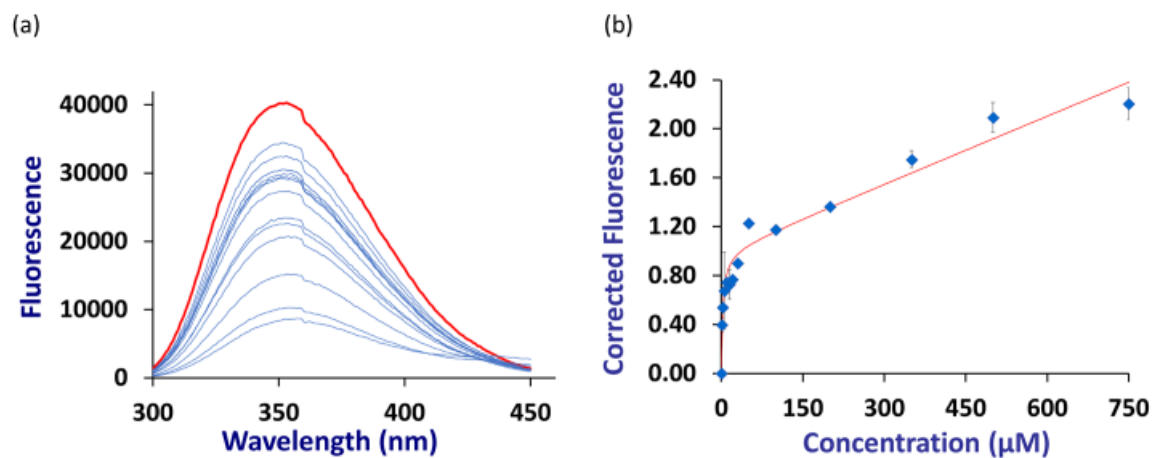

**Supplementary Figure S3:** (a) Changes in intrinsic fluorescence intensity of Tdp1 (10  $\mu\text{M}$ ) upon the addition of compound 11 (4S) (1  $\mu\text{M}$ , 2.5  $\mu\text{M}$ , 5  $\mu\text{M}$ , 10  $\mu\text{M}$ , 15  $\mu\text{M}$ , 20  $\mu\text{M}$ , 30  $\mu\text{M}$ , 50  $\mu\text{M}$ , 100  $\mu\text{M}$ , 200  $\mu\text{M}$ , 350  $\mu\text{M}$ , 500  $\mu\text{M}$  and 750  $\mu\text{M}$ ). Buffer was 20 mM Tris and 250 mM NaCl (pH 8). Excitation wavelength was 280 nm and intrinsic fluorescence was measured between 300 and 450 nm; (b) Non-linear curve fitting of the fluorescence data. The  $K_D$  was  $2.0 \pm 1.2$   $\mu\text{M}$ . Experiments were conducted in triplicate.

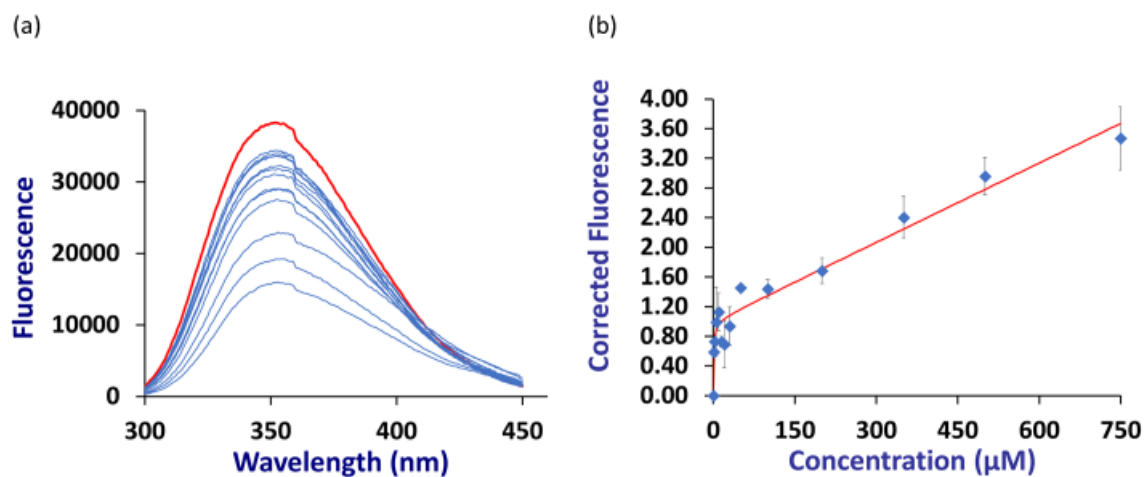

**Supplementary Figure S4:** (a) Changes in intrinsic fluorescence intensity of Tdp1 (10 μM) upon the addition of compound 11 (4R) (1 μM, 2.5 μM, 5 μM, 10 μM, 15 μM, 20 μM, 30 μM, 50 μM, 100 μM, 200 μM, 350 μM, 500 μM and 750 μM). Buffer was 20 mM Tris and 250 mM NaCl (pH 8). Excitation wavelength was 280 nm and intrinsic fluorescence was measured between 300 and 450 nm; (b) Non-linear curve fitting of the fluorescence data. The  $K_D$  was  $19.8 \pm 2.4$  μM. Experiments were conducted in triplicate.

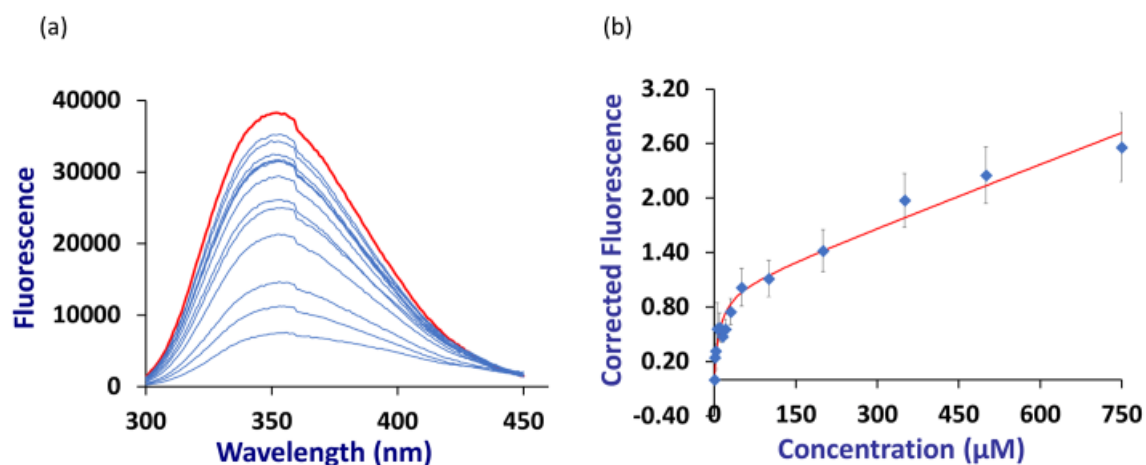

**Supplementary Figure S5:** (a) Changes in intrinsic fluorescence intensity of Tdp1 (10 μM) upon the addition of compound 12 (4S) (1 μM, 2.5 μM, 5 μM, 10 μM, 15 μM, 20 μM, 30 μM, 50 μM, 100 μM, 200 μM, 350 μM, 500 μM and 750 μM). Buffer was 20 mM Tris and 250 mM NaCl (pH 8). Excitation wavelength was 280 nm and intrinsic fluorescence was measured between 300 and 450 nm; (b) Non-linear curve fitting of the fluorescence data. The  $K_D$  was  $24.5 \pm 5.7$  μM. Experiments were conducted in triplicate.

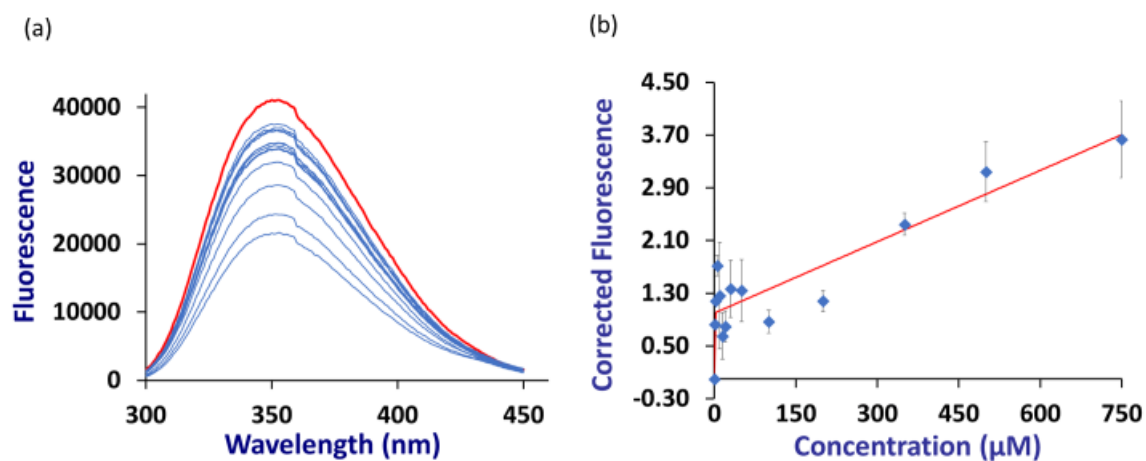

**Supplementary Figure S6:** (a) Changes in intrinsic fluorescence intensity of Tdp1 (10  $\mu\text{M}$ ) upon the addition of compound 13 (4S) (1  $\mu\text{M}$ , 2.5  $\mu\text{M}$ , 5  $\mu\text{M}$ , 10  $\mu\text{M}$ , 15  $\mu\text{M}$ , 20  $\mu\text{M}$ , 30  $\mu\text{M}$ , 50  $\mu\text{M}$ , 100  $\mu\text{M}$ , 200  $\mu\text{M}$ , 350  $\mu\text{M}$ , 500  $\mu\text{M}$  and 750  $\mu\text{M}$ ). Buffer was 20 mM Tris and 250 mM NaCl (pH 8). Excitation wavelength was 280 nm and intrinsic fluorescence was measured between 300 and 450 nm; (b) Non-linear curve fitting of the fluorescence data. The  $K_D$  was  $17.9 \pm 3.4 \mu\text{M}$ . Experiments were conducted in triplicate.



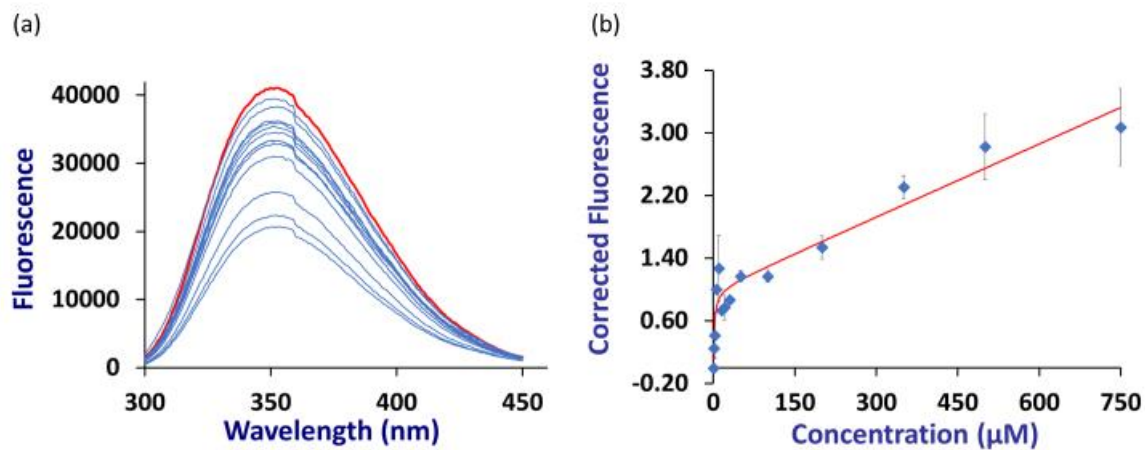

**Supplementary Figure S7:** (a) Changes in intrinsic fluorescence intensity of Tdp1 (10  $\mu\text{M}$ ) upon the addition of compound 13 (4R) (1  $\mu\text{M}$ , 2.5  $\mu\text{M}$ , 5  $\mu\text{M}$ , 10  $\mu\text{M}$ , 15  $\mu\text{M}$ , 20  $\mu\text{M}$ , 30  $\mu\text{M}$ , 50  $\mu\text{M}$ , 100  $\mu\text{M}$ , 200  $\mu\text{M}$ , 350  $\mu\text{M}$ , 500  $\mu\text{M}$  and 750  $\mu\text{M}$ ). Buffer was 20 mM Tris and 250 mM NaCl (pH 8). Excitation wavelength was 280 nm and intrinsic fluorescence was measured between 300 and 450 nm; (b) Non-linear curve fitting of the fluorescence data. The  $K_D$  was  $12.4 \pm 7.5 \mu\text{M}$ . Experiments were conducted in triplicate.
